# Supplementary material for: Theoretical study on the sensing mechanism of chalcone-based fluorescence probe for detecting hydrogen sulfide and biothiols
Source: Royal Society of Chemistry journal article supplement (doi:10.1039/d1nj03052c), 2021-01-01
Supplement: d1nj03052c1.pdf [file d1nj03052c1.pdf]

## Electronic Supplementary Information

for

# Theoretical study on the sensing mechanism of chalcone-based fluorescence probe for detecting hydrogen sulfide and biothiols

Yunjian Cao<sup>a,1</sup>, Lingling Wang<sup>b,c,1</sup>, Ziqi Liu<sup>a</sup>, Chaofan Sun<sup>a,\*</sup>, Yuanzuo Li<sup>a,\*</sup>

<sup>a</sup> College of Science, Northeast Forestry University, Harbin 150040, Heilongjiang, China

<sup>b</sup> College of Chemistry, Chemical Engineering and Resource Utilization, Northeast Forestry University, Harbin 150040, Heilongjiang, China

<sup>c</sup> Key Laboratory of Forest Plant Ecology, Ministry of Education, Northeast Forestry University, Harbin 150040, Heilongjiang, China

<sup>1</sup> These authors contributed equally to this work and should be considered co-first authors.

\*Corresponding authors: Chaofan Sun; Yuanzuo Li

E-mail addresses: cfsun@nefu.edu.cn; yzli@nefu.edu.cn

**Table S1.** The maximum absorption and fluorescence peaks (nm) of Pr1 and Comp2 in DMSO with various functional at 6-311G(d) basis set via the TD-DFT method.

|                                 | B3LYP  | Cam-B3LYP | B3PW91 | mPW1PW91 | PBEPBE | Exp. <sup>a</sup> |
|---------------------------------|--------|-----------|--------|----------|--------|-------------------|
| Pr1- $\lambda_{\text{abs}}$ .   | 419.79 | 366.46    | 420.01 | 406.26   | 500.51 | 420               |
| Comp2- $\lambda_{\text{abs}}$ . | 439.98 | 382.78    | 440.35 | 426.40   | 510.54 | 426~458           |
| Comp2-k- $\lambda_{\text{flu}}$ | 553.17 | 496.60    | 551.52 | 537.28   | 624.40 | 580               |

<sup>a</sup> Represents the maximum absorption peak measured in the experiment.
